# Supplementary material for: Alternative Splicing Regulation of Low-Frequency Genetic Variants in Exon 2 of TREM2 in Alzheimer’s Disease by Splicing-Based Aggregation
Source: MDPI journal article supplement (doi:10.3390/ijms22189865), 2021-09-13
Supplement: s1 [file s1]

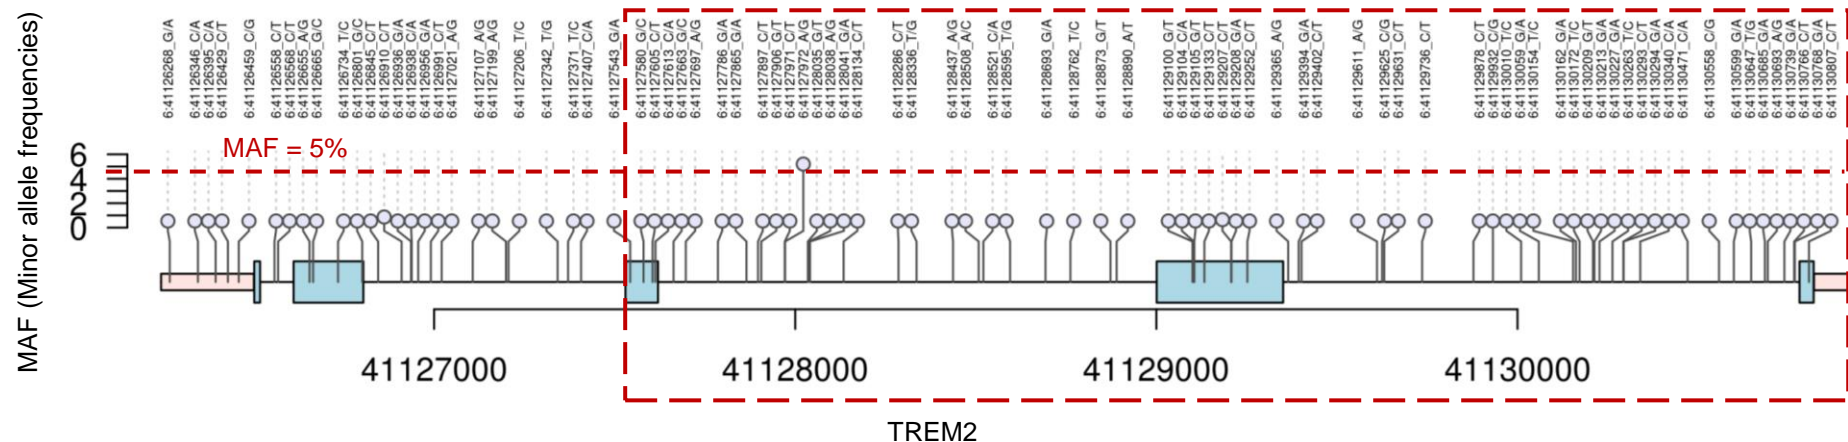

**Figure S1.** Minor allele frequencies (MAFs) of *TREM2* variants identified in our data. Here, we focus on 63 variants within exon 2 and its neighboring exons (i.e., the red box). The *trackViewer* R package was used for visualization.

### Enriched pathway

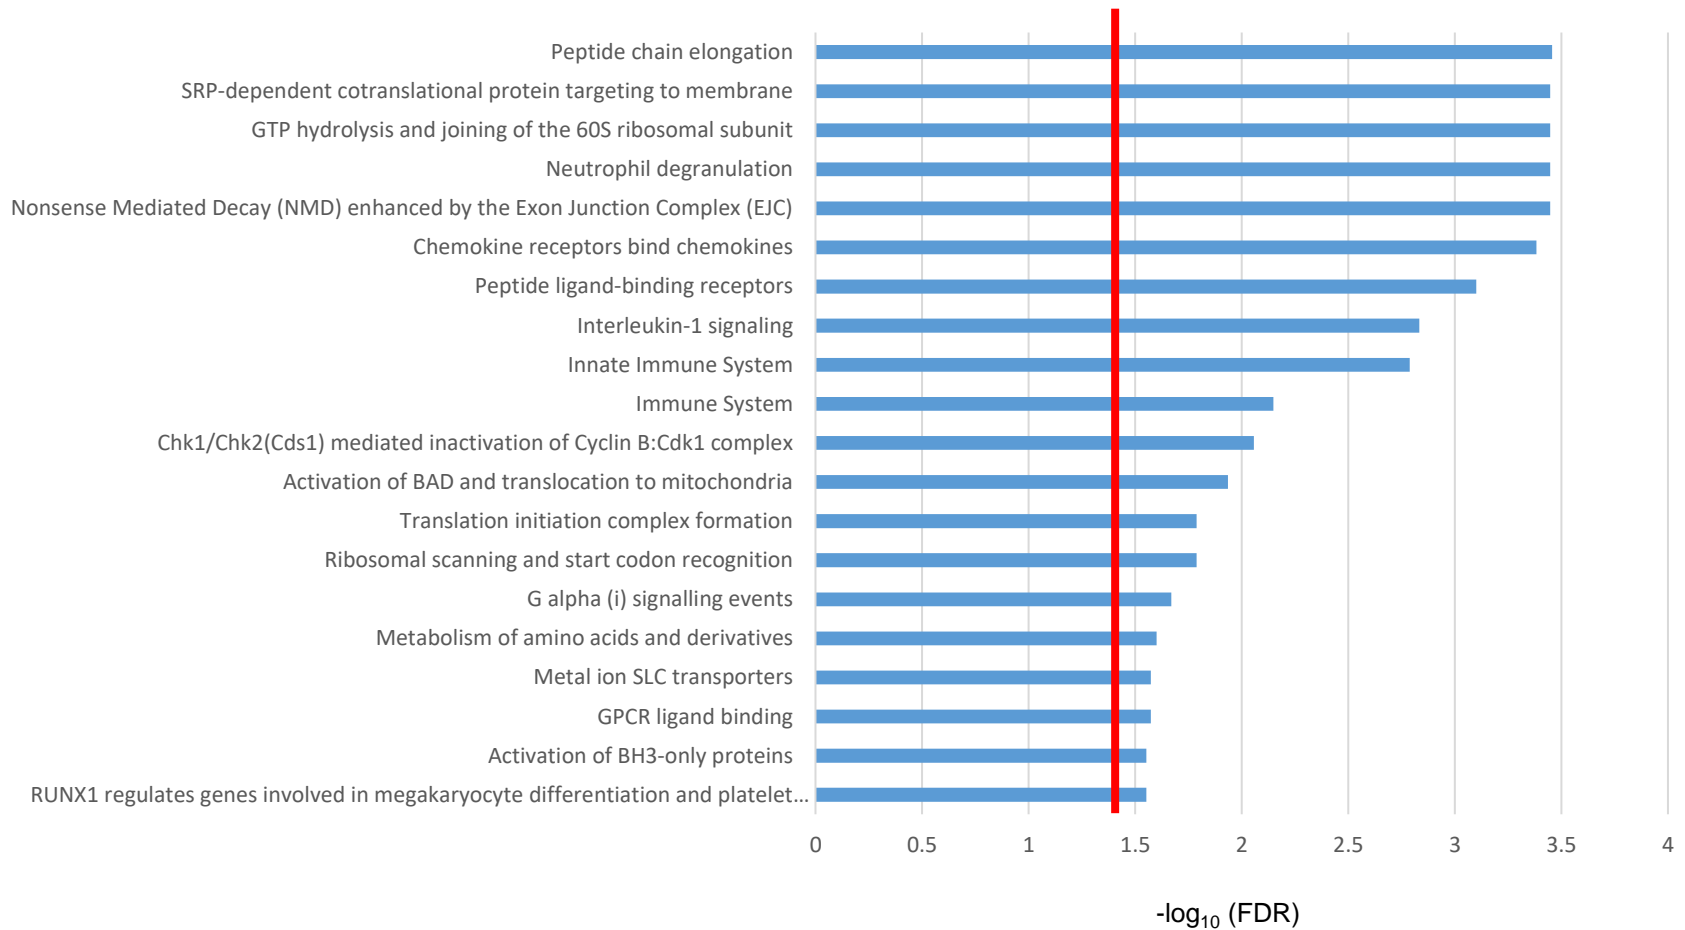

**Figure S2.** Immune-related functional REACTOME pathways enriched among genes differentially expressed between individuals with low and high skipping of the 2<sup>nd</sup> exon of *TREM2*. The red vertical line indicates the significant level (i.e., FDR = 0.05).

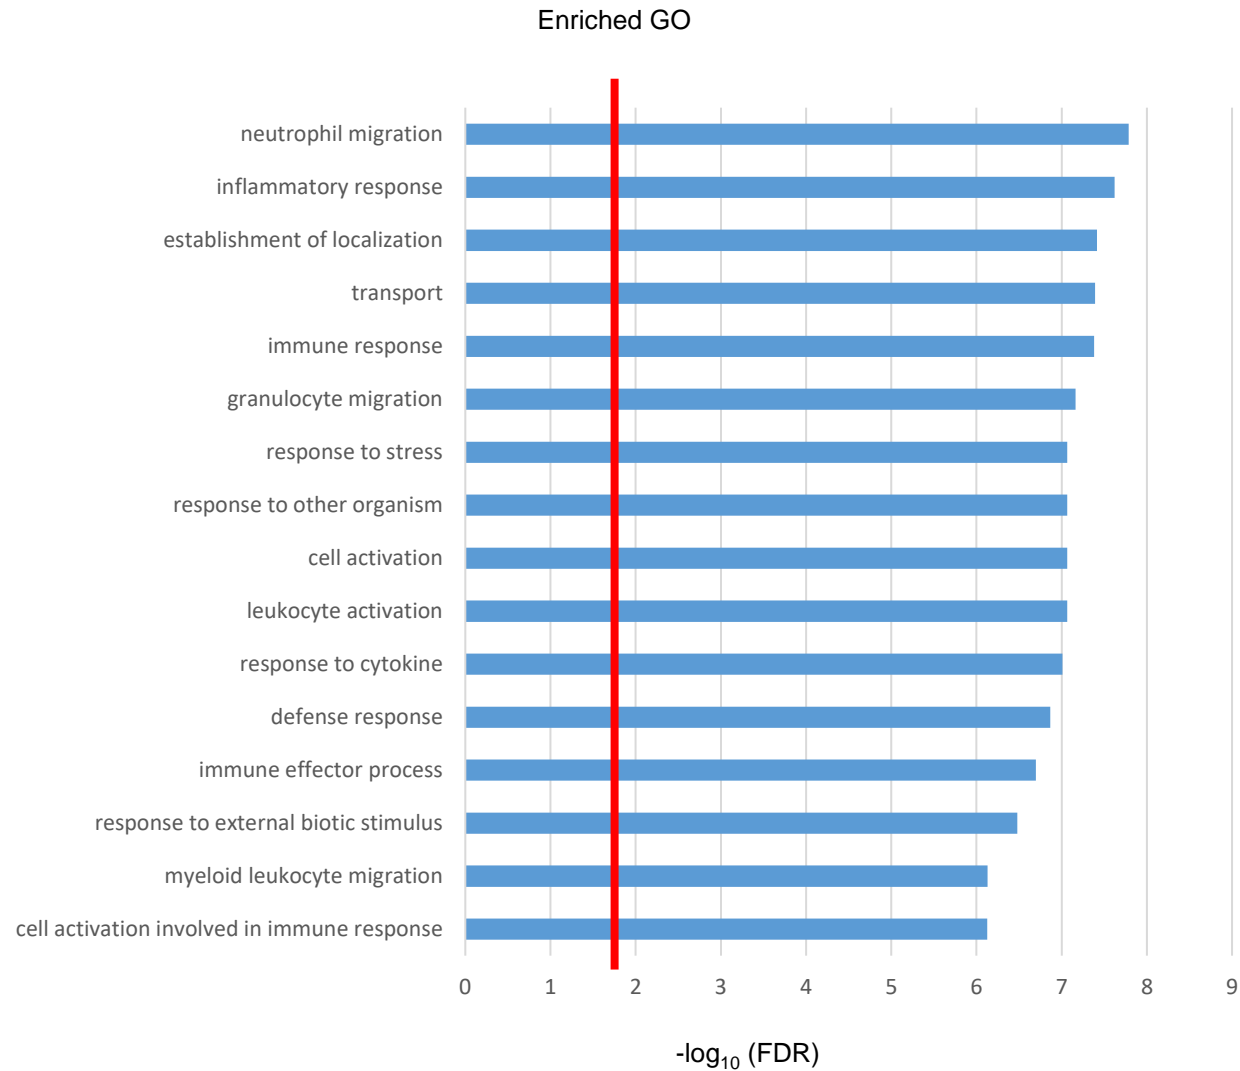

**Figure S3.** Immune-related GO terms enriched among genes differentially expressed between individuals with low and high skipping of the 2<sup>nd</sup> exon of *TREM2*. The red vertical line indicates the significant level (i.e., FDR = 0.05).

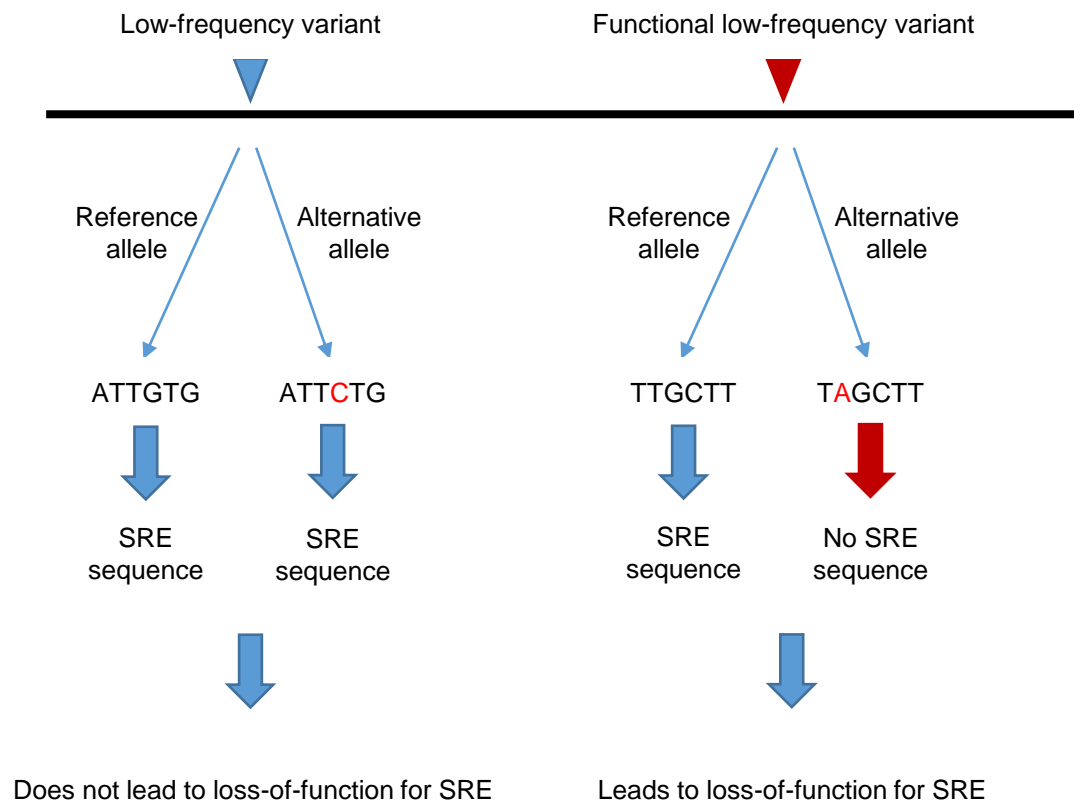

**Figure S4.** Definition of a functional variant based on SRE context. If the reference genotype matches a SRE sequence, but the alternative allele (i.e., red letter) does not, this variant could lead to loss-of-function of the SRE and is defined as a functional variant.

Table S1. The positions of 10 functional variants within SREs.

| rsid        | Position      | Ref. allele | Alt. allele | Ref. sequence        | Alt. sequence        | SREs in ref. sequences      | SREs in alt. sequences |
|-------------|---------------|-------------|-------------|----------------------|----------------------|-----------------------------|------------------------|
| rs182653531 | chr6:41127786 | G           | A           | <b>AGTGGG</b> CCGTT  | AGTGG <b>A</b> CCGTT | AGTGGG, GTGGGC              | x                      |
| rs115121185 | chr6:41127897 | C           | T           | <b>CCTTCC</b> GCACA  | CCTTCTGCACA          | CCTTCC                      | x                      |
| rs184276085 | chr6:41128762 | T           | C           | <b>GCAGGT</b> GATGC  | GCAGG <b>C</b> GATGC | GCAGGT,CAGGTG,AGGTGA        | x                      |
| rs936961326 | chr6:41128873 | G           | T           | <b>AGTAGGG</b> GAGAT | AGTAGTGAGAT          | GTAGGG,TAGGGA,AGGGAG,GGGAGA | x                      |
| rs143332484 | chr6:41129207 | C           | T           | CCACA <b>CGCTGG</b>  | CCACATGCTGG          | CGCTGG                      | x                      |
| rs201258314 | chr6:41129208 | G           | A           | CACA <b>CGCTGGC</b>  | <b>CACACA</b> CTGGC  | CGCTGG                      | ACACAC,CACACA          |
| rs565502230 | chr6:41129932 | C           | G           | AG <b>CCCC</b> CTGCT | AGCCC <b>G</b> CTGCT | CCCCTG, CCCTGC, CCTGCT      | x                      |
| rs59377666  | chr6:41130162 | G           | A           | GCACC <b>GTCTCT</b>  | GCACC <b>A</b> TCTCT | GTCTCT                      | x                      |
| rs74390253  | chr6:41130471 | C           | A           | AG <b>CTTCCCC</b> CA | AGCTT <b>A</b> CCCCA | CTTCCC,TTCCC,TCCCCC         | x                      |
| rs369487317 | chr6:41130739 | G           | A           | TCAAA <b>GTGAGG</b>  | TCAAA <b>A</b> TGAGG | GTGAGG                      | x                      |

Red and blue colors indicate an exon skipping enhancer (i.e., ESE and ISE) and silencer (ESS) in SRE, respectively.

Bold refers a reference or alternative allele of variants.

Table S2. Individuals carrying functional variants.

| Disease status | Sex    | PSI   | Variants                    |
|----------------|--------|-------|-----------------------------|
| AD             | Female | 1     | chr6:41130162               |
| AD             | Female | 0.692 | chr6:41130162               |
| AD             | Female | 0.778 | chr6:41129207               |
| AD             | Female | 0.871 | chr6:41130162,chr6:41130471 |
| AD             | Female | 1     | chr6:41130162,chr6:41130471 |
| AD             | Male   | 0.778 | chr6:41129207               |
| AD             | Male   | 1     | chr6:41129207               |
| AD             | Female | 0.854 | chr6:41128873               |
| AD             | Female | 0.926 | chr6:41128873               |
| AD             | Female | 0.818 | chr6:41129208,chr6:41130739 |
| AD             | Female | 0.8   | chr6:41129208,chr6:41130739 |
| AD             | Female | 0.909 | chr6:41129932               |
| AD             | Female | 0.9   | chr6:41129932               |
| AD             | Female | 0.76  | chr6:41128762               |
| AD             | Male   | 0.852 | chr6:41130162               |
| AD             | Male   | 0.722 | chr6:41130162               |
| AD             | Male   | 0.867 | chr6:41130162               |
| AD             | Male   | 0.5   | chr6:41129207               |
| AD             | Male   | 1     | chr6:41129207               |
| AD             | Female | 0.75  | chr6:41130162,chr6:41130471 |
| AD             | Female | 0.714 | chr6:41130162,chr6:41130471 |
| AD             | Male   | 1     | chr6:41130162               |
| AD             | Male   | 0.75  | chr6:41129207               |
| AD             | Female | 0.862 | chr6:41129207               |
| AD             | Male   | 0.875 | chr6:41129932               |
| AD             | Female | 0.941 | chr6:41129207               |
| AD             | Female | 1     | chr6:41129207               |
| AD             | Male   | 1     | chr6:41129207               |
| AD             | Female | 0.862 | chr6:41129207               |
| AD             | Male   | 0.75  | chr6:41127786               |
| AD             | Female | 0.714 | chr6:41129207               |
| AD             | Female | 0.857 | chr6:41129207               |
| AD             | Female | 0.667 | chr6:41129207               |
| AD             | Female | 0.913 | chr6:41129207               |
| AD             | Female | 0.802 | chr6:41130162,chr6:41130471 |
| AD             | Female | 1     | chr6:41129207               |
| CN             | Male   | 1     | chr6:41127897               |
| CN             | Male   | 0.538 | chr6:41130162               |
| CN             | Male   | 0.632 | chr6:41130162               |
| CN             | Female | 1     | chr6:41128762               |
| CN             | Female | 0.895 | chr6:41129207               |
| CN             | Male   | 0.833 | chr6:41130162               |
| CN             | Female | 0.939 | chr6:41127897               |
| CN             | Female | 0.875 | chr6:41127897               |

|    |        |       |                             |
|----|--------|-------|-----------------------------|
| CN | Male   | 0.98  | chr6:41129932               |
| CN | Male   | 0.829 | chr6:41129207               |
| CN | Male   | 0.667 | chr6:41129207               |
| CN | Male   | 0.8   | chr6:41129932               |
| CN | Female | 0.949 | chr6:41129207               |
| CN | Male   | 1     | chr6:41130739               |
| CN | Female | 1     | chr6:41130162,chr6:41130471 |
| CN | Female | 0.976 | chr6:41129207               |

Table S3. Differentially expressed genes between samples with low- and high-PSI values of exon 2.

| GeneID   | Ensembl transcriptID | FDR         | Fold change  |
|----------|----------------------|-------------|--------------|
| IL1B     | ENST00000263341      | 3.26E-12    | 3.198465919  |
| GPR84    | ENST00000267015      | 5.21E-11    | 2.45140965   |
| CCL2     | ENST00000225831      | 5.78E-10    | 2.929687277  |
| FCER1G   | ENST00000490414      | 1.39E-08    | 2.480163699  |
| ICAM1    | ENST00000264832      | 2.93E-08    | 2.096651723  |
| BATF     | ENST00000286639      | 4.46E-08    | 2.398003926  |
| SIGLEC9  | ENST00000440804      | 5.69E-08    | 2.073651496  |
| SERPINA1 | ENST00000393087      | 5.69E-08    | 2.036576363  |
| HAMP     | ENST00000222304      | 6.03E-08    | 2.431166133  |
| CHI3L1   | ENST00000472064      | 1.10E-07    | 2.037096325  |
| HAMP     | ENST00000598398      | 3.22E-07    | 2.754895582  |
| SERPINA3 | ENST00000482740      | 8.20E-07    | 2.31792971   |
| SLC11A1  | ENST00000354352      | 3.09E-06    | 2.256521841  |
| BCL2A1   | ENST00000267953      | 3.34E-06    | 2.091704341  |
| CHI3L1   | ENST00000478742      | 5.71E-06    | 2.08667426   |
| SERPINA3 | ENST00000556968      | 6.71E-06    | 2.292378595  |
| CHI3L1   | ENST00000473185      | 9.27E-06    | 2.50604024   |
| SERPINA3 | ENST00000556388      | 1.62E-05    | 2.174382632  |
| GAPDH    | ENST00000492719      | 3.40E-05    | 2.052334671  |
| SLC1A5   | ENST00000412532      | 3.42E-05    | 2.594352603  |
| RUNX1    | ENST00000325074      | 5.46E-05    | 2.741464209  |
| CP       | ENST00000460674      | 7.28E-05    | 2.29626851   |
| YWHAH    | ENST00000471374      | 9.94E-05    | 2.94333831   |
| STAB1    | ENST00000462741      | 0.000106204 | 2.059575093  |
| YBX3     | ENST00000228251      | 0.00011798  | 2.094983634  |
| MT1A     | ENST00000290705      | 0.000169901 | 2.106493946  |
| FOSL1    | ENST00000312562      | 0.000237511 | 2.478285448  |
| COX7A2   | ENST00000472311      | 0.00024826  | 2.619067574  |
| C3       | ENST00000599668      | 0.000249871 | 2.111490292  |
| HSPA6    | ENST00000309758      | 0.000290526 | 4.670248096  |
| CXCL2    | ENST00000508487      | 0.000581454 | 2.105298362  |
| GABARAP  | ENST00000570856      | 0.001399893 | 2.421332063  |
| CLDN11   | ENST00000489485      | 0.001434229 | 2.405419245  |
| CDK2     | ENST00000555408      | 0.001576344 | 2.009516361  |
| ARHGEF40 | ENST00000553709      | 0.002697549 | -2.032641881 |
| BSCL2    | ENST00000421906      | 0.002699923 | 2.569483435  |
| SFN      | ENST00000339276      | 0.002724247 | 2.074913807  |
| CXCL10   | ENST00000306602      | 0.003355138 | 2.146658958  |
| RPS24    | ENST00000464716      | 0.004342484 | 2.022765212  |
| HSPA1A   | ENST00000608703      | 0.004356686 | 2.111602676  |
| CXCL3    | ENST00000296026      | 0.006842996 | 2.120094775  |
| RPS27    | ENST00000392558      | 0.007375178 | 2.465661187  |
| IL1R1    | ENST00000409589      | 0.00775483  | 2.111107838  |
| CXCL2    | ENST00000510048      | 0.008973947 | 2.075831437  |



|         |                 |             |              |
|---------|-----------------|-------------|--------------|
| ATP5B   | ENST00000551182 | 0.009391684 | 2.252858307  |
| PREB    | ENST00000456259 | 0.009451667 | 2.110922171  |
| TMEM70  | ENST00000517439 | 0.009489252 | -2.123820017 |
| CXCL1   | ENST00000509101 | 0.009751183 | 2.908122121  |
| RPL4    | ENST00000566039 | 0.011236964 | 2.49606125   |
| NDUFS8  | ENST00000528492 | 0.012092791 | 2.323440668  |
| FBXL16  | ENST00000562563 | 0.012576076 | -3.237091434 |
| RPL36   | ENST00000579446 | 0.013770543 | 2.370317325  |
| CXCL2   | ENST00000296031 | 0.015065078 | 2.141763723  |
| SLC1A2  | ENST00000606205 | 0.017024108 | -2.239092098 |
| ZNF326  | ENST00000394583 | 0.01882383  | 2.499926274  |
| MPPE1   | ENST00000586364 | 0.01978445  | -2.000986835 |
| KCNC4   | ENST00000489935 | 0.021384463 | -2.036712687 |
| MAP2K1  | ENST00000425818 | 0.021485216 | -2.179477721 |
| HGS     | ENST00000573320 | 0.021522337 | 3.354943383  |
| APP     | ENST00000474136 | 0.024360777 | -2.233781332 |
| JPH3    | ENST00000537256 | 0.025716855 | -2.174434502 |
| TNFSF14 | ENST00000245912 | 0.026668465 | 2.322433678  |
| RPL37   | ENST00000507642 | 0.028276685 | 2.12337477   |
| MYH11   | ENST00000576790 | 0.029311117 | -2.406307281 |
| CXCL1   | ENST00000395761 | 0.029340761 | 2.130680929  |
| IGHA1   | ENST00000390547 | 0.033557967 | 2.004726148  |
| NDRG2   | ENST00000557676 | 0.035148479 | 2.042849576  |
| GOLM1   | ENST00000388711 | 0.037501247 | 2.173182221  |
| CCL3    | ENST00000225245 | 0.039130404 | 2.680096667  |
| TERF2   | ENST00000566051 | 0.041434574 | -2.412073475 |
| RPS20   | ENST00000519606 | 0.042653661 | 2.064298616  |
| VPS51   | ENST00000533827 | 0.042800636 | 2.62793456   |
| SIN3B   | ENST00000595900 | 0.049904527 | -2.343667496 |

Table S4. Demographic information of analyzed samples.

| Region                        | MSBB                                                                                                               |                                                                                                       | ROSMAP                                                                                    |
|-------------------------------|--------------------------------------------------------------------------------------------------------------------|-------------------------------------------------------------------------------------------------------|-------------------------------------------------------------------------------------------|
|                               | FP <sup>a</sup>                                                                                                    | IFG <sup>b</sup>                                                                                      | DLPFC <sup>c</sup>                                                                        |
| # of AD samples (Male/Female) | 175 (53/122)                                                                                                       | 157 (43/114)                                                                                          | 376 (126/250)                                                                             |
| # of CN samples (Male/Female) | 72 (36/36)                                                                                                         | 63 (33/30)                                                                                            | 213 (82/131)                                                                              |
| Male/ Female                  | 89/158                                                                                                             | 76/144                                                                                                | 208/381                                                                                   |
| Braak stage                   | 3.75 (1.89) [0-6]                                                                                                  | 3.68 (1.83) [0-6]                                                                                     | 4.49 (1.25) [0-6]                                                                         |
| APOE                          | E2E2: 2<br>E2E3: 17<br>E2E4: 1<br>E3E3:84<br>E3E4: 44<br>E4E4: 3<br>Unknown: 96<br>Freq. <sup>d</sup> of E4: 0.168 | E2E2: 2<br>E2E3: 15<br>E2E4: 1<br>E3E3:73<br>E3E4: 37<br>E4E4: 3<br>Unknown: 89<br>Freq. of E4: 0.167 | E2E2: 5<br>E2E3: 77<br>E2E4: 13<br>E3E3:360<br>E3E4: 129<br>E4E4: 5<br>Freq. of E4: 0.129 |

a. FP. Frontal pole

b. IFG. Inferior frontal gyrus

c. DLPFC. Dorsolateral prefrontal cortex

d. Freq. Frequency
